# Supplementary material for: Ultrasmall Mo2C nanocrystals embedded in N-doped porous carbons as a surface-dominated capacitive anode for lithium-ion capacitors
Source: Royal Society of Chemistry journal article supplement (doi:10.1039/d1cc00630d), 2021-01-01
Supplement: d1cc00630d1.pdf [file d1cc00630d1.pdf]

*Electronic Supplementary Information*

**Ultrasmall Mo<sub>2</sub>C nanocrystals embedded in N-doped porous carbons as surface-dominated capacitive anode for lithium-ion capacitors**

**Xufei Liu,<sup>a</sup> Xiaofang Zhang,<sup>b</sup> Yu Dou,<sup>a</sup> Peng Mei,<sup>b</sup> Xiaolan Ma<sup>a</sup> and Yingkui Yang<sup>\*ab</sup>**

*<sup>a</sup> Key Laboratory of Catalysis and Energy Materials Chemistry of Ministry of Education & Hubei Key Laboratory of Catalysis and Materials Science, South-Central University for Nationalities, Wuhan 430074, China*

*E-mail: [ykyang@mail.scuec.edu.cn](mailto:ykyang@mail.scuec.edu.cn)*

*<sup>b</sup> Hubei Engineering Technology Research Centre of Energy Polymer Materials, School of Chemistry and Materials Science, South-Central University for Nationalities, Wuhan 430074, China*

## **Experimental section**

### ***Materials***

Pyromellitic dianhydride (PMDA) and 4, 4'-methylenedianiline (MDA) were obtained from Aladdin Industrial Corporation (Shanghai, China). Anhydrous ethylene diamine (EDA) and phosphomolybdic acid ( $\text{PMo}_{12}$ ) were supplied by Sinopharm Chemical Reagent Limited Corporation. All chemicals were used without further purification.

### ***Synthesis of $\text{Mo}_2\text{C@NCB}$ , $\text{Mo}_2\text{C@NCS}$ , $\text{NCB}$ , and $\text{NCS}$***

Typically, PMDA (2 mmol, 436.2 mg) was dissolved in 50 mL deionized water, and an equimolar diamine (MDA or EDA) was then added to obtain a comonomer salt by stirring overnight at room temperature. To the comonomer salt (solid: 750 mg) solution was added  $\text{PMo}_{12}$  (250 mg), and the resultant mixture was transferred into a 100 mL Teflon-inner autoclave and heated at 200°C for 12 h. After cooling down naturally, the products were collected by filtrating, washing with deionized water and ethanol, and drying overnight, yielding Mo-containing polyimide precursors.  $\text{Mo}_2\text{C@NCB}$  and  $\text{Mo}_2\text{C@NCS}$  were finally obtained by calcination of the Mo-containing polyimides derived from PMDA-MDA and PMDA-EDA at 350°C for 2h and then 800°C for 2 h under Ar flowing, respectively. In particular, the loading amount of  $\text{Mo}_2\text{C}$  in  $\text{Mo}_2\text{C@NCB}$  was adjusted by changing the mass feed ratio of  $\text{PMo}_{12}$  to PMDA-MDA comonomer salts into 1:1.5, 1:3, and 1:6. Similarly, NCB and NCS were also produced by identical experiments in the absence of  $\text{PMo}_{12}$  using pure polyimides derived from PMDA-MDA and PMDA-EDA, respectively.

### ***General characterization***

The morphologies were acquired from analyzed by transmission electron microscope (TEM, Tecnai G2 20 S-TWIN), and scanning electron microscopy (SEM, SU8010). Energy dispersed X-ray spectroscopy (EDS) was performed on scanning transmission electron microscopy (STEM, Talos F200X). The Nitrogen adsorption/desorption isotherms were measured by ASAP 2020 Plus, specific

surface area (SSA) and pore volumes were calculated based on the Brunauer-Emmett-Teller (BET) model and nonlocal density functional theory (DFT), respectively. Before adsorption measurements, all the samples were degassed at 350°C for 24 h under vacuum. X-ray photoelectron spectra (XPS) were determined by an X-ray photoelectron spectrometer with an excitation source of Mg K $\alpha$  on ESCALAB Xi<sup>+</sup>. Crystalline structures were recorded on a D8 Advance X-ray diffraction (XRD) with a scan rate of 10° min<sup>-1</sup>. Raman spectra were collected on a Renishaw spectrometer with an excitation laser of  $\lambda = 532$  nm. Thermo gravimetric analysis (TGA) was tested via Netzsch TG 209 F3 Tarsus, with a heating rate of 10 °C min<sup>-1</sup> under an air atmosphere. In particular, the loading level of Mo<sub>2</sub>C in Mo<sub>2</sub>C@NCB and Mo<sub>2</sub>C@NCS was calculated according to the method reported previously.<sup>1</sup>

### ***Electrochemical measurements***

The working electrodes were fabricated by mixing active materials (80%), super P (10%), and polyvinylidene fluoride (10%) in NMP, obtaining the slurry followed by blade-coating onto the corresponding current collector (using Al foil for the cathode and Cu foil for the anode, respectively). After drying at 80°C for 12 h, the electrodes were punched into 10 mm disks in diameter, and the loading mass of active materials was around 4–6 mg cm<sup>-2</sup> on each electrode. Coin-type cells for LIBs were assembled in the Ar-filled glove box, and lithium foil, Celgard-2400, and 1 M LiPF<sub>6</sub> in EC/DEC/DMC (1:1:1 in volume) were employed as the counter electrode, separator, and electrolyte, respectively. As for LICs, NCB was selected as the cathode material. Of note, the Mo<sub>2</sub>C@NCB and Mo<sub>2</sub>C@NCS based anodes were pre-lithiated by charging/discharging for 10 cycles at 0.1 A g<sup>-1</sup> and discharged to 0.01 V. The mass ratio of cathode/anode in LICs was adjusted in the range of 1:1 to 4:1. The electrochemical performance was tested on a Land CT 2001A automatic battery tester (Wuhan, China) in the voltage range of 0.01–3 V. The cyclic voltammetry (CV) plot and electrochemical impedance spectroscopy (EIS) tests were investigated on a CHI660E (Chenhua, China) electrochemical work station at room temperature.

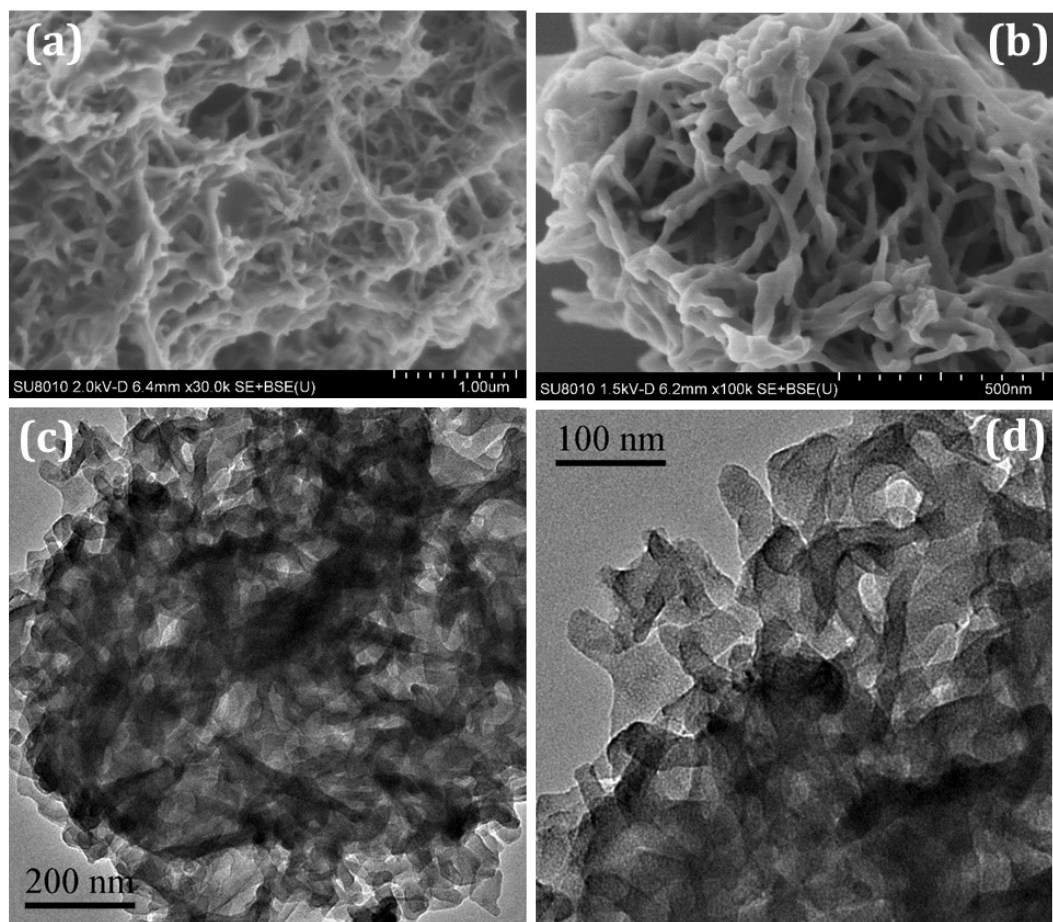

**Fig. S1** SEM (a, b) and TEM (c, d) images of nitrogen-doped carbon nanobelts (NCB).

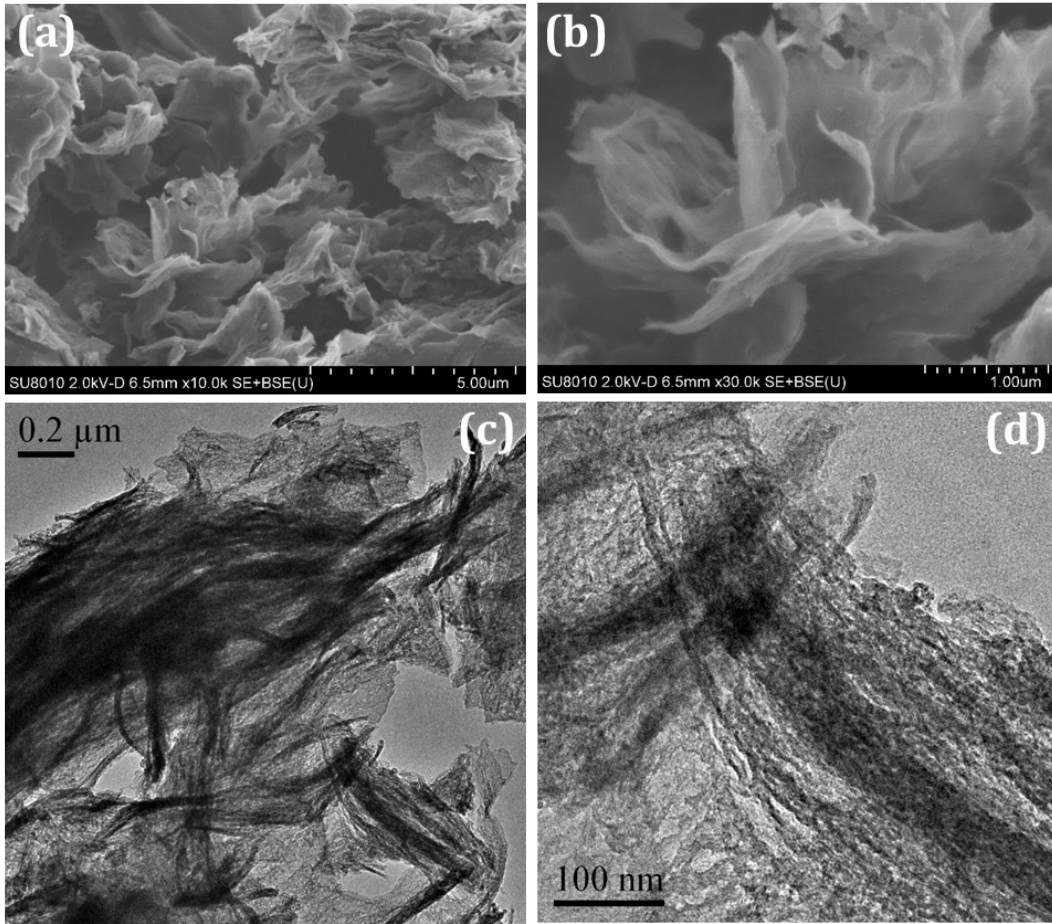

**Fig. S2** SEM (a, b) and TEM (c, d) images of nitrogen-doped carbon nanosheets (NCS).

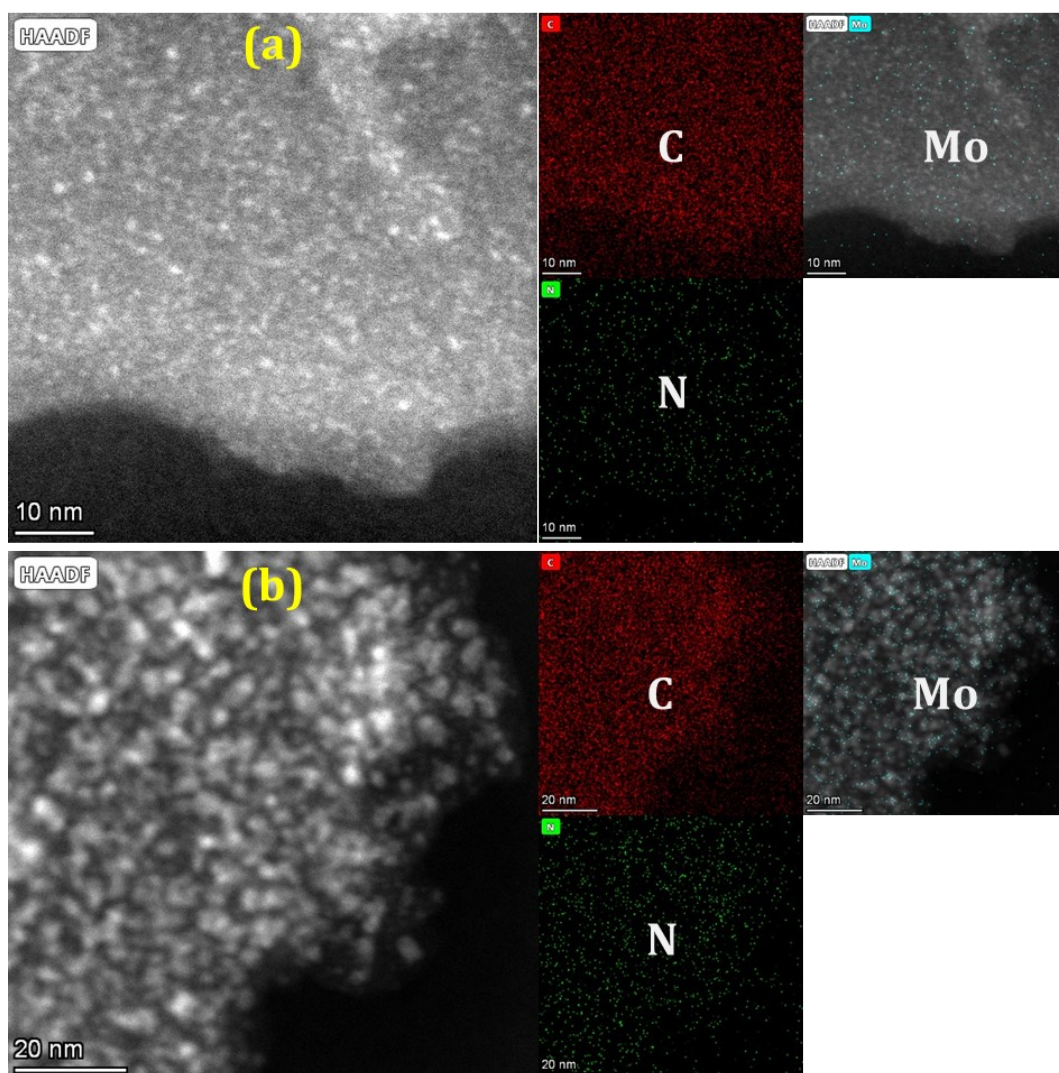

**Fig. S3** STEM images and the corresponding elemental mappings of C, Mo, N, of (a) Mo<sub>2</sub>C@NCB and (b) Mo<sub>2</sub>C@NCS derived from the feed ratio of 1:3 for PMo<sub>12</sub> to PMDA-MDA comonomer salts.

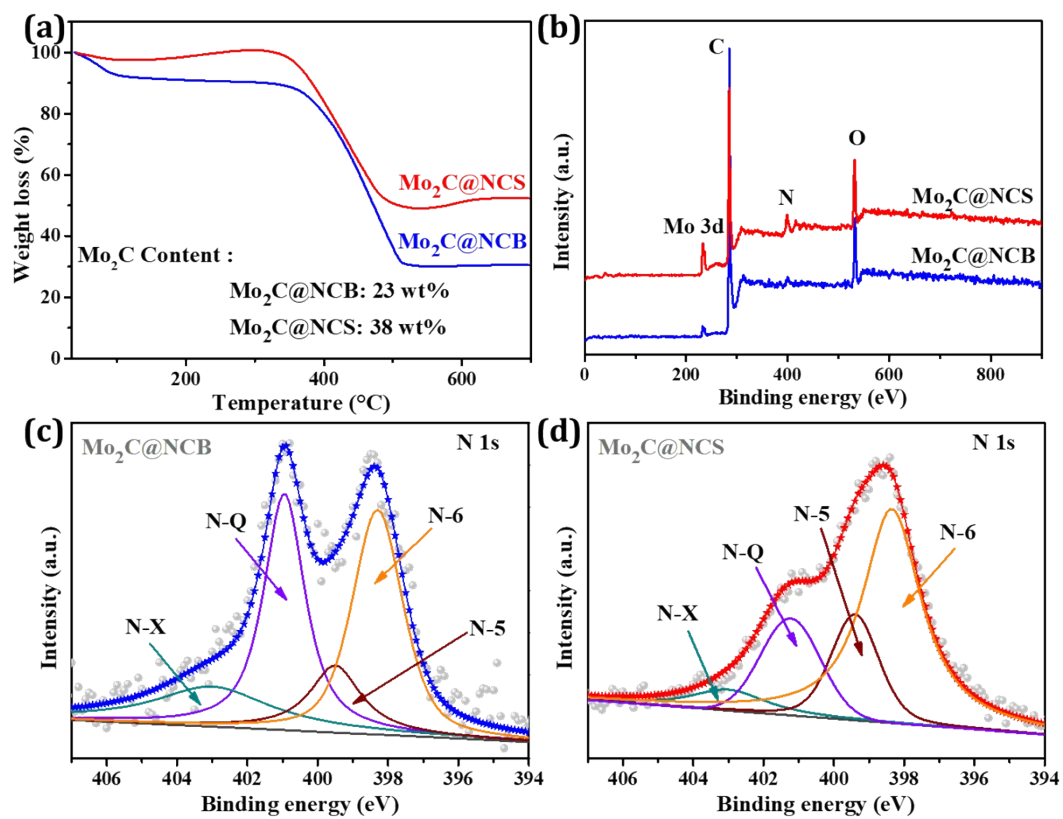

**Fig. S4** (a) TGA curves, (b) XPS spectra, and core-level high-resolution N 1s spectra for (c) Mo<sub>2</sub>C@NCB and (d) Mo<sub>2</sub>C@NCS.

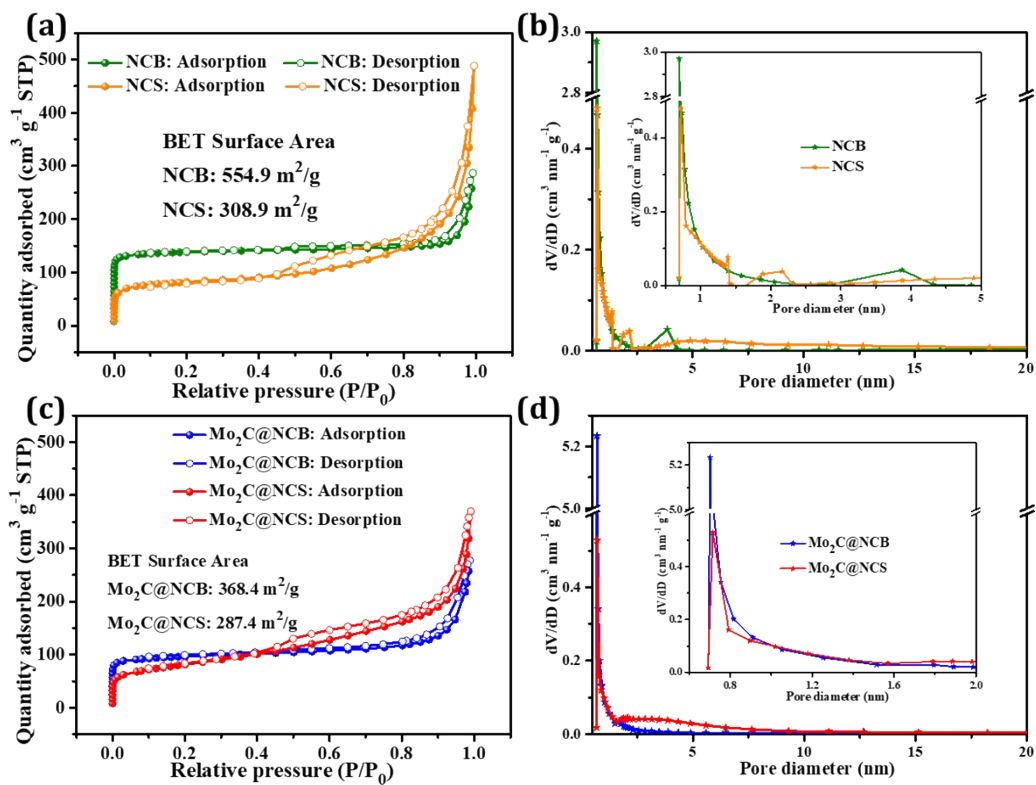

**Fig. S5** (a, c)  $\text{N}_2$  adsorption/desorption isotherms and (b, d) pore diameter distributions for (a, b) NCB and NCS, and (c, d)  $\text{Mo}_2\text{C@NCB}$  and  $\text{Mo}_2\text{C@NCS}$ .



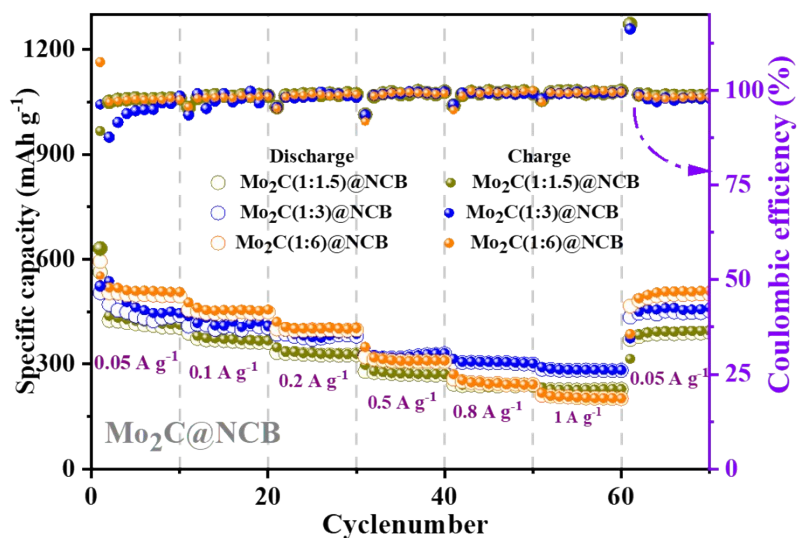

**Fig. S6** Rate performance of  $\text{Mo}_2\text{C}@ \text{NCB}$ -based anodes fabricated by the mass feed ratio of 1:1.5, 1:3, and 1:6 for  $\text{PMo}_{12}$  to PMDA-MDA comonomer salts. The lower amount of  $\text{Mo}_2\text{C}$  in  $\text{Mo}_2\text{C}@ \text{NCB}$  leads a lower specific capacity, and the higher amount of  $\text{Mo}_2\text{C}$  in  $\text{Mo}_2\text{C}@ \text{NCB}$  results in a higher initial capacity but an inferior rate performance. In contrast, the  $\text{Mo}_2\text{C}@ \text{NCB}$  anode with a moderate loading (38%) of  $\text{Mo}_2\text{C}$  shows an optimal combination of specific capacity and rate capability, and was thus used as the anode of LICs in our work.

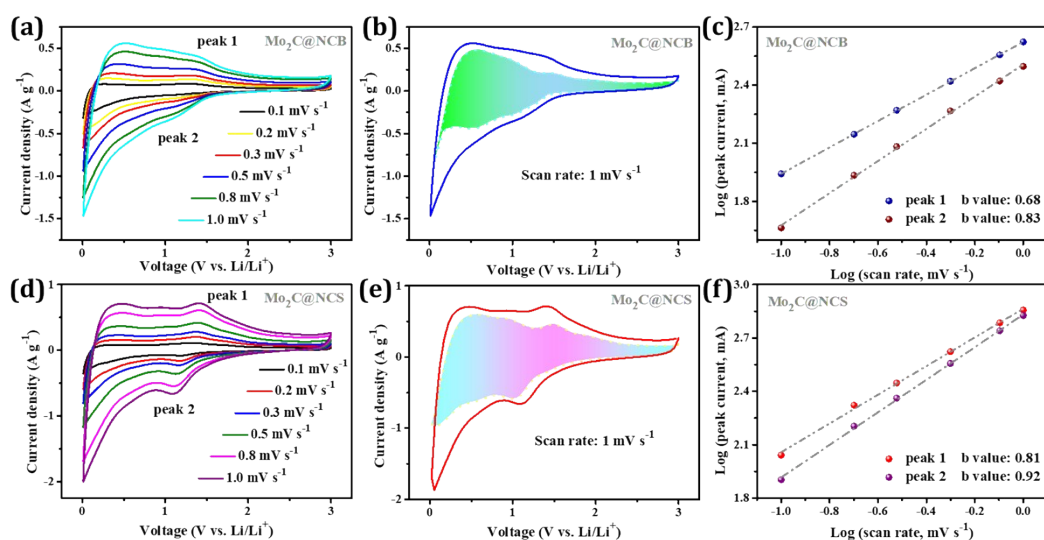

**Fig. S7** (a, d) CV curves at scan rates of 0.1–1  $\text{mV s}^{-1}$ , (b, e) the separation of capacitive and diffusion current at 1  $\text{mV s}^{-1}$ , and (c, f) the  $\log(i)$  versus  $\log(v)$  plots and their fitting  $b$ -values for  $\text{Mo}_2\text{C@NCB}$  and  $\text{Mo}_2\text{C@NCS}$  anodes.

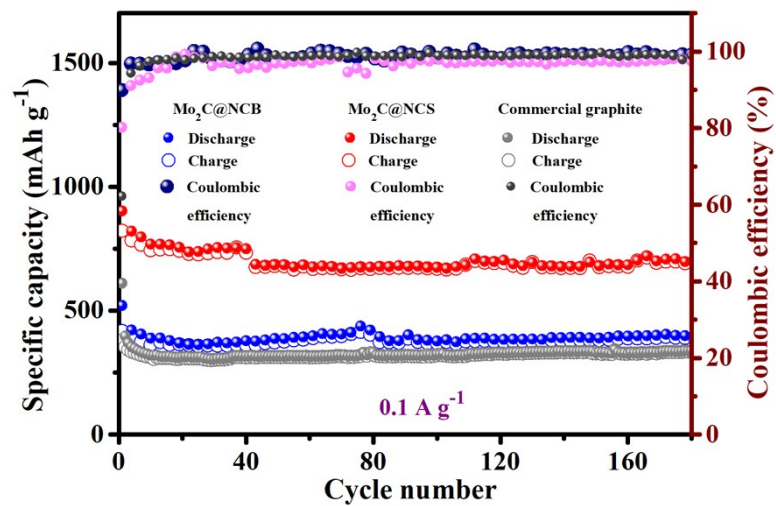

**Fig. S8** Cycling performance of commercial graphite, and Mo<sub>2</sub>C@NCB and Mo<sub>2</sub>C@NCS anodes.

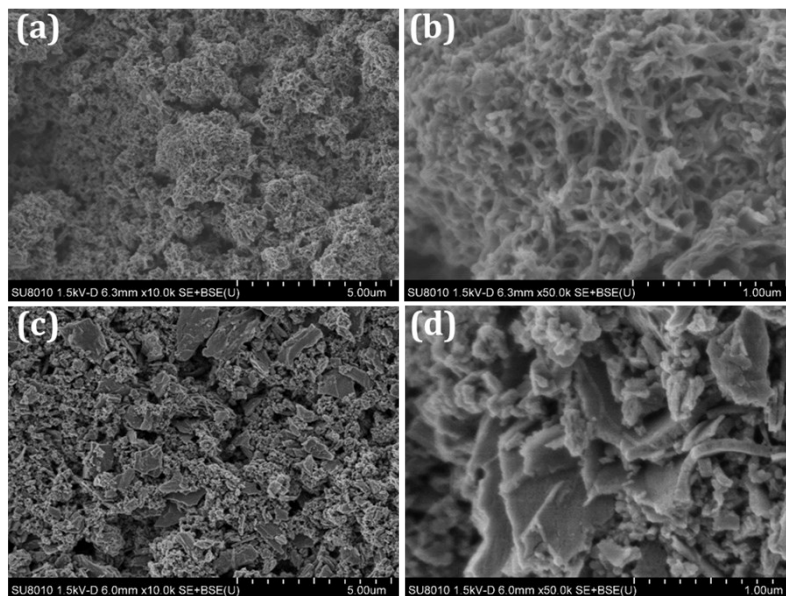

**Fig. S9** SEM images of (a, b) Mo<sub>2</sub>C@NCB and (c, d) Mo<sub>2</sub>C@NCS anodes after running 180 cycles.

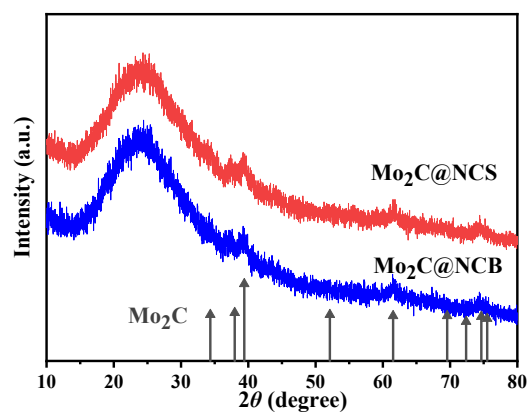

**Fig. S10** XRD patterns of Mo<sub>2</sub>C@NCB and (c, d) Mo<sub>2</sub>C@NCS anodes after running 180 cycles.

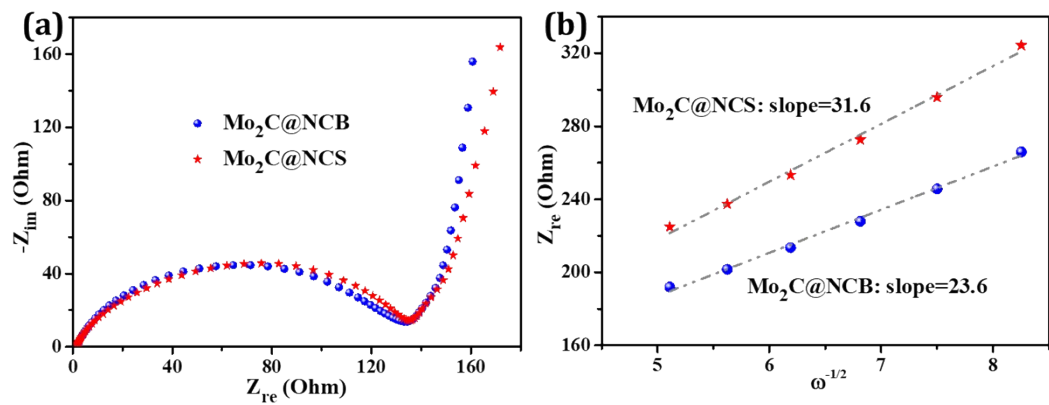

**Fig. S11** (a) Nyquist plots, and (b) the relationship between the real part of the impedance ( $Z_{re}$ ) and the reciprocal of the square root of frequency ( $\omega^{-1/2}$ ) for  $\text{Mo}_2\text{C@NCB}$  and  $\text{Mo}_2\text{C@NCS}$  anodes.

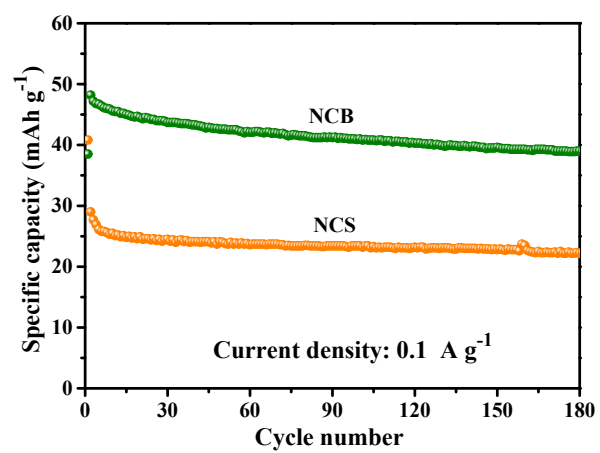

**Fig. S12** Cycling stability of half-cell based on NCB and NCS electrodes at 0.1 A g<sup>-1</sup>.

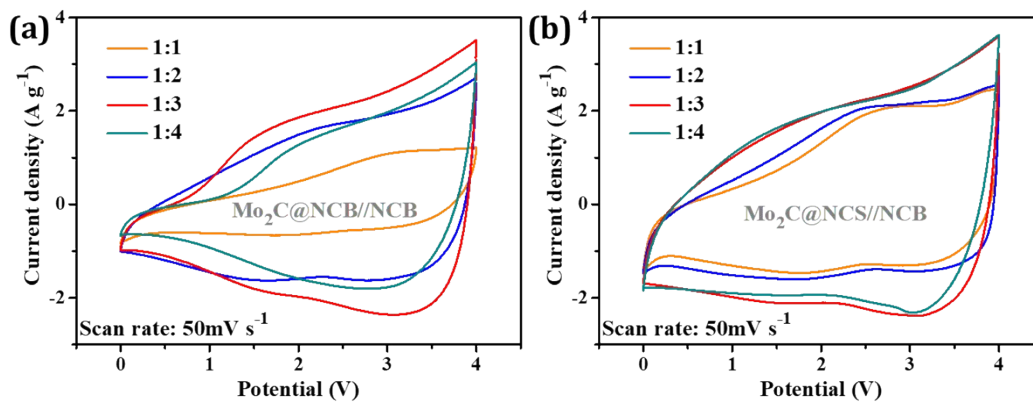

**Fig. S13** CV curves of (a) Mo<sub>2</sub>C@NCB//NCB and (b) Mo<sub>2</sub>C@NCS//NCB devices fabricated with different mass ratio of active materials in two asymmetric electrodes system at 50 mV s<sup>-1</sup>.



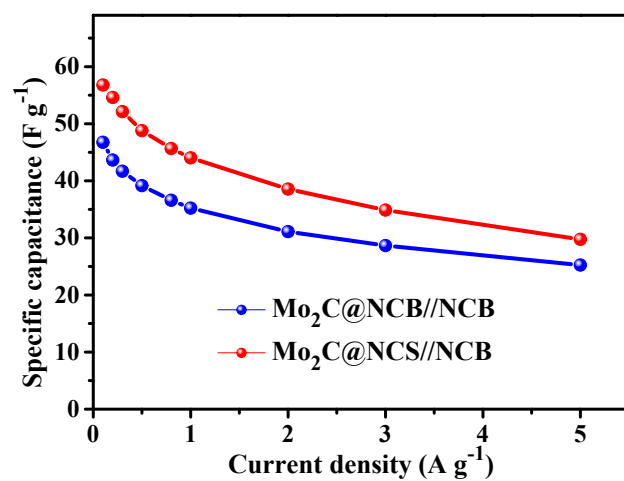

**Fig. S14** Specific capacitances of both Mo<sub>2</sub>C@NCB//NCB and Mo<sub>2</sub>C@NCS//NCB LICs at different current densities.

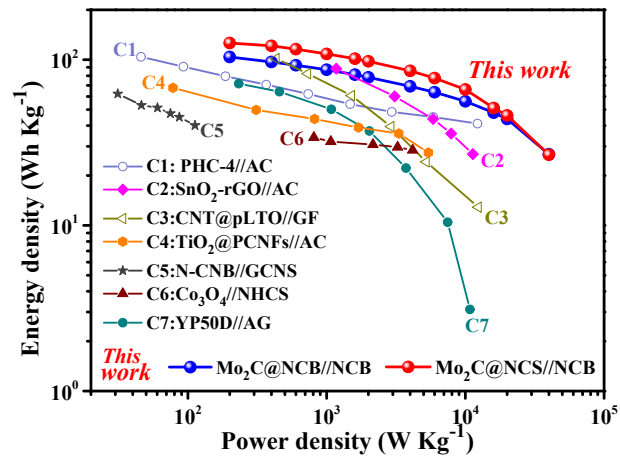

**Fig. S15** Ragone plots of Mo<sub>2</sub>C@NCB//NCB and Mo<sub>2</sub>C@NCS//NCB devices and reported previously (C1,<sup>2</sup> C2,<sup>3</sup> C3,<sup>4</sup> C4,<sup>5</sup> C5,<sup>6</sup> C6,<sup>7</sup> and C7<sup>8</sup>).

**Table S1** Initial capacity and cycling stability of Mo<sub>2</sub>C@NCB and Mo<sub>2</sub>C@NCS anodes and the previously-reported Mo<sub>2</sub>C-contained anodes for LIBs

| Anode                                   | Mo <sub>2</sub> C (wt.%) | Initial discharge capacity                             | Cycling stability                                      | Ref.             |
|-----------------------------------------|--------------------------|--------------------------------------------------------|--------------------------------------------------------|------------------|
| MoO <sub>2</sub> /Mo <sub>2</sub> C     | 30                       | 480 mAh g <sup>-1</sup> at 200 mA g <sup>-1</sup>      | 164.6% after 50 cycles at 200 mA g <sup>-1</sup>       | 9                |
| MoO <sub>2</sub> /Mo <sub>2</sub> C/C   | 54.9                     | 1172 mAh g <sup>-1</sup> at 100 mA g <sup>-1</sup>     | 68.3 % after 100 cycles at 100 mA g <sup>-1</sup>      | 10               |
| Mo <sub>2</sub> C-C                     | 66.44                    | 951.2 mAh g <sup>-1</sup> at 100 mA g <sup>-1</sup>    | 70.7% after 50 cycles at 100 mA g <sup>-1</sup>        | 11               |
| H-Mo <sub>2</sub> C@C/NFs               | 26.5                     | 1176.3 mAh g <sup>-1</sup> at 100 mA g <sup>-1</sup>   | 73.5% after 70 cycles at 100 mA g <sup>-1</sup>        | 12               |
| Mo <sub>2</sub> C@OLC/a-C NCs           | —                        | 1065 mAh g <sup>-1</sup> at 100 mA g <sup>-1</sup>     | 66.5% after 100 cycles at 100 mA g <sup>-1</sup>       | 13               |
| MoO <sub>2</sub> /Mo <sub>2</sub> C/RGO | 9.3                      | 722 mAh g <sup>-1</sup> at 50 mA g <sup>-1</sup>       | 69.2% after 150 cycles at 50 mA g <sup>-1</sup>        | 14               |
| Mo <sub>2</sub> C-NCNFs                 | 57.86                    | 1070.9 mAh g <sup>-1</sup> at 100 mA g <sup>-1</sup>   | 61.4% after 50 cycles at 100 mA g <sup>-1</sup>        | 15               |
| <b>Mo<sub>2</sub>C@NCB</b>              | <b>23</b>                | <b>1043 mAh g<sup>-1</sup> at 50 mA g<sup>-1</sup></b> | <b>86.3% after 180 cycles at 100 mA g<sup>-1</sup></b> | <b>This work</b> |
| <b>Mo<sub>2</sub>C@NCS</b>              | <b>38</b>                | <b>1537 mAh g<sup>-1</sup> at 50 mA g<sup>-1</sup></b> | <b>85.6% after 180 cycles at 100 mA g<sup>-1</sup></b> |                  |

**Table S2** Electrochemical performance of both Mo<sub>2</sub>C@NCB//NCB and Mo<sub>2</sub>C@NCS//NCS LICs and the previously-reported LICs

| LICs                                                   | Potential (V) | Capacitance (C <sub>cell</sub> )                             | Rate capability                                            | Cycling stability                                                                  | Ref.             |
|--------------------------------------------------------|---------------|--------------------------------------------------------------|------------------------------------------------------------|------------------------------------------------------------------------------------|------------------|
| TiC//PHPNC                                             | 0~4.5         | 36 F g <sup>-1</sup><br>at 0.2 A g <sup>-1</sup>             | 8.3 F g <sup>-1</sup><br>at 30 A g <sup>-1</sup>           | 82% after<br>5000 cycles<br>at 2 A g <sup>-1</sup>                                 | 16               |
| SC//AC/Li <sub>3</sub> N                               | 2~4           | 43.7 F g <sup>-1</sup><br>at 0.05 A g <sup>-1</sup>          | 14.9 F g <sup>-1</sup><br>at 5 A g <sup>-1</sup>           | 91% after<br>10,000 cycles<br>at 0.5 A g <sup>-1</sup>                             | 17               |
| LiTi <sub>2</sub> (PO <sub>4</sub> ) <sub>3</sub> //AC | 0~3           | 16 F g <sup>-1</sup><br>at 0.03 A g <sup>-1</sup>            | 3 F g <sup>-1</sup><br>at 0.09 A g <sup>-1</sup>           | 60% after<br>250 cycles<br>at 0.06 A g <sup>-1</sup>                               | 18               |
| T-Nb <sub>2</sub> O <sub>5</sub> MNSs/rGo<br>//MC/rGo  | 0.5~3         | 45.9 F g <sup>-1</sup><br>at 0.05 A g <sup>-1</sup>          | 16.9 F g <sup>-1</sup><br>at 10 A g <sup>-1</sup>          | 82% after<br>4000 cycles<br>at 1 A g <sup>-1</sup>                                 | 19               |
| LiCrTiO <sub>4</sub> //AC                              | 1~3           | 21 F g <sup>-1</sup><br>at 0.4 A g <sup>-1</sup>             | 4 F g <sup>-1</sup><br>at 2 A g <sup>-1</sup>              | 85.5% after<br>1000 cycles<br>at 0.4 A g <sup>-1</sup>                             | 20               |
| TiO <sub>2</sub> NBA<br>//Graphene                     | 0~3.8         | 41 F g <sup>-1</sup><br>at 0.3 A g <sup>-1</sup>             | 10.5 F g <sup>-1</sup><br>at 10 A g <sup>-1</sup>          | 73% after<br>600 cycles<br>at 1 A g <sup>-1</sup>                                  | 21               |
| Graphene-wrapped<br>LTO//AC                            | 1~2.5         | 20.9 F g <sup>-1</sup><br>at 0.1 mA cm <sup>-2</sup>         | 6.4 F g <sup>-1</sup><br>at 15 mA cm <sup>-2</sup>         | 75% after<br>1000 cycles<br>at 1 mA cm <sup>-2</sup>                               | 22               |
| <b>Mo<sub>2</sub>C@NCB//NCB</b>                        | <b>0~4</b>    | <b>47 F g<sup>-1</sup></b><br><b>at 0.1 A g<sup>-1</sup></b> | <b>25 F g<sup>-1</sup></b><br><b>at 5 A g<sup>-1</sup></b> | <b>86% after</b><br><b>10,000</b><br><b>cycles</b><br><b>at 5 A g<sup>-1</sup></b> | <b>This work</b> |
| <b>Mo<sub>2</sub>C@NCS//NCB</b>                        | <b>0~4</b>    | <b>57 F g<sup>-1</sup></b><br><b>at 0.1 A g<sup>-1</sup></b> | <b>30 F g<sup>-1</sup></b><br><b>at 5 A g<sup>-1</sup></b> | <b>80% after</b><br><b>10,000</b><br><b>cycles</b><br><b>at 5 A g<sup>-1</sup></b> |                  |

## References

1. Y. Y. Chen, Y. Zhang, W. J. Jiang, X. Zhang, Z. Dai, L. J. Wan and J. S. Hu, *ACS Nano*, 2016, **10**, 8851.
2. Z. Yang, Y. Gao, Z. Zhao, Y. Wang, Y. Wu and X. Wang, *J. Power Sources*, 2020, **474**, 228500.
3. M. Arnaiz, C. Botas, D. Carriazo, R. Mysyk, F. Mijangos, T. Rojo, J. Ajuria and E. Goikolea, *Electrochim. Acta*, 2018, **284**, 542.
4. Y. Liu, W. Wang, J. Chen, X. Li, Q. Cheng and G. Wang, *J. Energy Chem.*, 2020, **50**, 344.
5. J. Zhang, H. Chen, X. Sun, X. Kang, Y. Zhang, C. Xu and Y. Zhang, *J. Electrochem. Soc.*, 2017, **164**, A820.
6. J.-T. Su, Y.-J. Wu, C.-L. Huang, Y.-A. Chen, H.-Y. Cheng, P.-Y. Cheng, C.-T. Hsieh and S.-Y. Lu, *Chem. Eng. J.*, 2020, **396**, 125314.
7. X. Wang, H. Xia, X. Wang, J. Gao, B. Shi and Y. Fang, *J. Alloys Compd.*, 2016, **686**, 969.
8. R. Lu, X. Ren, C. Zhan, C. Wang, R. Lv, W. Shen, F. Kang and Z.-H. Huang, *J. Alloys Compd.*, 2020, **835**, 155398.
9. H.-J. Zhang, K.-X. Wang, X.-Y. Wu, Y.-M. Jiang, Y.-B. Zhai, C. Wang, X. Wei and J.-S. Chen, *Adv. Funct. Mater.*, 2014, **24**, 3399.
10. M. Ihsan, H. Wang, S. R. Majid, J. Yang, S. J. Kennedy, Z. Guo and H. K. Liu, *Carbon*, 2016, **96**, 1200.
11. Q. Gao, X. Zhao, Y. Xiao, D. Zhao and M. Cao, *Nanoscale*, 2014, **6**, 6151.
12. M. Zhang, X. Huang, H. Xin, D. Li, Y. Zhao, L. Shi, Y. Lin, J. Yu, Z. Yu, C. Zhu and J. Xu, *Appl. Surf. Sci.*, 2019, **473**, 352.
13. X. Liu, Z. Li, S. Zhang, H. Long, H. Wei, H. Zhang, H. Li and C. Zhao, *Ceram. Int.*, 2017, **43**, 14446.
14. W. Devina, J. Hwang and J. Kim, *Chem. Eng. J.*, 2018, **345**, 1.
15. R. Li, S. Wang, W. Wang and M. Cao, *Phys. Chem. Chem. Phys.*, 2015, **17**, 24803.
16. H. Wang, Y. Zhang, H. Ang, Y. Zhang, H. T. Tan, Y. Zhang, Y. Guo, J. B. Franklin, X. L. Wu, M. Srinivasan, H. J. Fan and Q. Yan, *Adv. Funct. Mater.*, 2016, **26**, 3082.
17. C. Sun, X. Zhang, C. Li, K. Wang, X. Sun and Y. Ma, *Energy Storage Mater.*, 2020, **24**, 160.
18. V. Aravindan, W. Chuiling, M. V. Reddy, G. V. Rao, B. V. Chowdari and S. Madhavi, *Phys. Chem. Chem. Phys.*, 2012, **14**, 5808.
19. G. Ma, K. Li, Y. Li, B. Gao, T. Ding, Q. Zhong, J. Su, L. Gong, J. Chen, L. Yuan, B. Hu, J. Zhou and K. Huo, *Chem. Electro. Chem.*, 2016, **3**, 1360.
20. V. Aravindan, W. Chuiling and S. Madhavi, *J. Mater. Chem.*, 2012, **22**, 16026.
21. H. Wang, C. Guan, X. Wang and H. J. Fan, *Small*, 2015, **11**, 1470.
22. H. Kim, K.-Y. Park, M.-Y. Cho, M.-H. Kim, J. Hong, S.-K. Jung, K. C. Roh and K. Kang, *Chem. Electro. Chem.*, 2014, **1**, 125.
